# Supplementary material for: Dual Promoters Improve the Rescue of Recombinant Measles Virus in Human Cells
Source: MDPI journal article supplement (doi:10.3390/v13091723), 2021-08-30
Supplement: s1 [file s1]

## Supplementary Material

**Table S1: Primers used to generate plasmid back bone.** The MV antigenome cDNA sequence is displayed in underlined lowercase *italics* letters, the ribozyme HDVr<sub>z</sub> is shown in capital letters and the partial pCi-neo-CAV1 vector is indicated in bold lowercase letters). The reverse primer R1 has a hammerhead ribozyme sequence (HHR<sub>z</sub>), the T7 promoter sequence and leader sequence of the MV antigenome. Numbers in the nucleotide location indicate the position on the MV IC-B sequence (accession no.: AB016162.1).

| Name                             | Nucleotide location | sequence (5'--->3')                                                                                                                                |
|----------------------------------|---------------------|----------------------------------------------------------------------------------------------------------------------------------------------------|
| trailer_HDVr <sub>z</sub> -pCi-s | 15874 - 15894       | <u>gtttctattcccagctttgtctggt</u> GGGTCGGCATGGCATCTCCACCTCCTCGCGGTCCGACCTGGGCATCCGAAGGAGGACGCACGTCCACTCGGATGGCTAAGGGAGAGCC <b>Actagagtcgacccggg</b> |
| T7_HHR <sub>z</sub> _leader_as   | 1 -21               | <u>ctatccttaccgaactttgtttggt</u> GACCCGGTACGCCGGGTTTCGTCCTCACGGACTCATCAGACCAAAC <b>Cctatagtgagtcgtattaa</b>                                        |
| MV_Trailer_s                     | 15874 - 15894       | GTTTCTATTCCCAGCTTTGTCTGCT                                                                                                                          |
| MV_Leader_as                     | 21-1                | CTATCCTTACCCAACCTTTGTTTGGT                                                                                                                         |
| MV_Leader-s                      | 1-21                | ACCAAACAAAGTTGGGTAAGGATAG                                                                                                                          |
| M-BstEII-as                      | 4871 -4801          | gttgGGTCACtgcgtc                                                                                                                                   |
| F-BstEII-s                       | 4801 - 4817         | gaccgaGGTGACCcaac                                                                                                                                  |
| MV_H4_as                         | 8458 - 8458         | ATCCTTCAATGGTGCCCACTCGGGA                                                                                                                          |
| MVH_forward                      | 8385 - 8406         | CAGATGACAAGTTGCGAATGGA                                                                                                                             |
| Trailer_MV-as                    | 15874 - 15894       | ACCAGACAAAGCTGGG AATAGAAAC                                                                                                                         |

**Table S2: Primers used to sequence the MV plasmids.** Numbers in the nomenclature indicate the nucleotide position according to the MV IC-B sequence (accession no.: AB016162.1).

| Name             | sequence (5'--->3')       |
|------------------|---------------------------|
| T7-Promotor-as   | CCCTATAGTGAGTCGTATT       |
| Leader-MV-N-s    | ACCAAACAAAGTTGGGTAAGGATAG |
| MV-N-s/Leader    | ACCAAACAAAGTTGGGTAAGG     |
| N-Start-s        | ATGGCCACACTTTGAGG         |
| MV-N-Q-s         | TATYGAAGTGCAAGAYCCTGAGG   |
| Roche-MV-N-s     | GGGTCTTGCTCGCAAAGG        |
| MV-N-Q-as        | CCTTCTTAGCTCYGAATCAGCTG   |
| Roche-MV-N-as    | CCTTCTTAGCTCCGAATCAGC     |
| MV-NLC-s         | TTAGGGCAAGAGATGGTGAGG     |
| MV-NLC-as        | ATCTCTGAAACAAGCCTTGC      |
| P-vor-Start-as   | CGGCTCCAGTCGTGGG          |
| P-Start-s        | ATGGCAGAAGAGCAGGC         |
| MV-P1            | ACTCCAATCCAGAGGCAACAAC    |
| MV-P2            | TTCGGGTGTCCACTCCTGTATC    |
| P-Stop-as        | CTACTTCATTATTATCTTCATCAG  |
| P-nach-Stop-s    | CTACAGCTCAACTTACCTGC      |
| MV-M-Sall-s      | ACCCCATGCCAGTCGAC         |
| MV-M-Sall-as     | GTCGACTGGCATGGGGT         |
| MV-M-vor-Start-s | TGATTGCCTCCTAAGTTCCACA    |

|                   |                               |
|-------------------|-------------------------------|
| MV-M-Start-s      | ATGACAGAGATCTACGATTTTC        |
| MV-M-Mitte-s      | CCTGCCCTTAGGTGTTGGTAG         |
| MV-M-Mitte-as     | CCGTTATCCGAAAGACGGGT          |
| MV-M-vor-ende-s   | GGTTTTTGCACTTGGTGGGA          |
| MV-M-vor-ende-as  | ATCACGTCGTCGTAAATGCG          |
| F-BstEII-s        | GACCGAGGTGACCCAAC             |
| M-BstEII-as       | GCGGTTGGGTCACCTC              |
| MV-F-vor-Start-s  | CACCGGGAATCCCAGAATCA          |
| MV-F-nach-Start-s | CTGCACGAGGGTAGAGATCG          |
| Roche-MV-F-s      | ATCAGGCAATTGAGGCAATC          |
| MV-F-Mitte-s      | ATTGGCTGTTCAGGGTGTCC          |
| Roche-MV-F-as     | GACACCCTGAACAGCCAATATC        |
| MV-F-Mitte-as     | TGTCCCTACGTCCAACCTCT          |
| MV-FLA-fwd        | GGTTTATCGAGCACTAGCAT          |
| MV-FLA-rev        | GACATACCAACTTGTTCTCC          |
| F-PacI-s          | CGGTAGTTAATTAAGCTAGGGTG       |
| F-PacI-as         | CACCCTAAGTTTAACTAATACCG       |
| MVH-fwd           | CAGATGACAAGTTGCGAATGGA        |
| H-Spel-s          | GCATACCCACTAGTGAAATAG         |
| H-Spel 19nt-s     | GATGTCACCCAGACATCAG           |
| H-Spel-as         | CTATTTCACTAGTGGGTATGC         |
| L-Start-s         | ATGGACTCGCTATCTGTCAAC         |
| MV-L 9460-s       | CTTAGRAGTTAYCCGGCCCA          |
| MV-L 9742-as      | AAACCAAAACAGAAAGGGYTCAA       |
| MV-L 10032-s      | TGGTTTCTCCCTGCACTCG           |
| MV-L 10629-s      | GGACAAGGCACTTGCTGCTC          |
| MV-L 10821-as     | TTGAACTCAGGGTCATGGAGG         |
| MV-L 11053-s      | GGGCCAGTCYAAAAACCYA           |
| MV-L 11374-as     | GGGGCAATGAGGRTCACTYA          |
| MV-L 11670-s      | TGAYATTGGCCATCACCTCAA         |
| MV-L 11849-as     | CRATATTRCTGCATGCTGCCC         |
| L-NheI-s          | CTAGACTGGGCTAGCGAC            |
| L-NheI-as         | GTCGCTAGCCCAGTCTAG            |
| MV-L 12571-s      | GCAGGGATGGTGCTATTGACA         |
| MV-L 12993-as     | TCATCATCACCSKAAGCCCA          |
| MV-L 13167-s      | CACAATCTCCAAYGACAATCTCTCA     |
| MV-L 13783-as     | YGADGACAACAGCTCACCCA          |
| MV-L 14169-s      | GGMAGAGGCTAKGYTATCTCCAGC      |
| MV-L 14406-as     | TCATCGTGTGGRGGTCTGAA          |
| MV-L 14962-as     | TTTGCCMARGAGYAGAGCCA          |
| MV-L 15114-s      | WGAYCTCAARGCTAACCGGC          |
| MV-L 15776-as     | TCAGRGCRCGTATCCGACT           |
| L-Stop-as         | TTAATCCTTAATCAGAGCGC          |
| MV-Trailer30-s    | ATATATTAAAGAAAACCTTGAAAAACGAA |

**Figure S1: Vector maps of the plasmids**

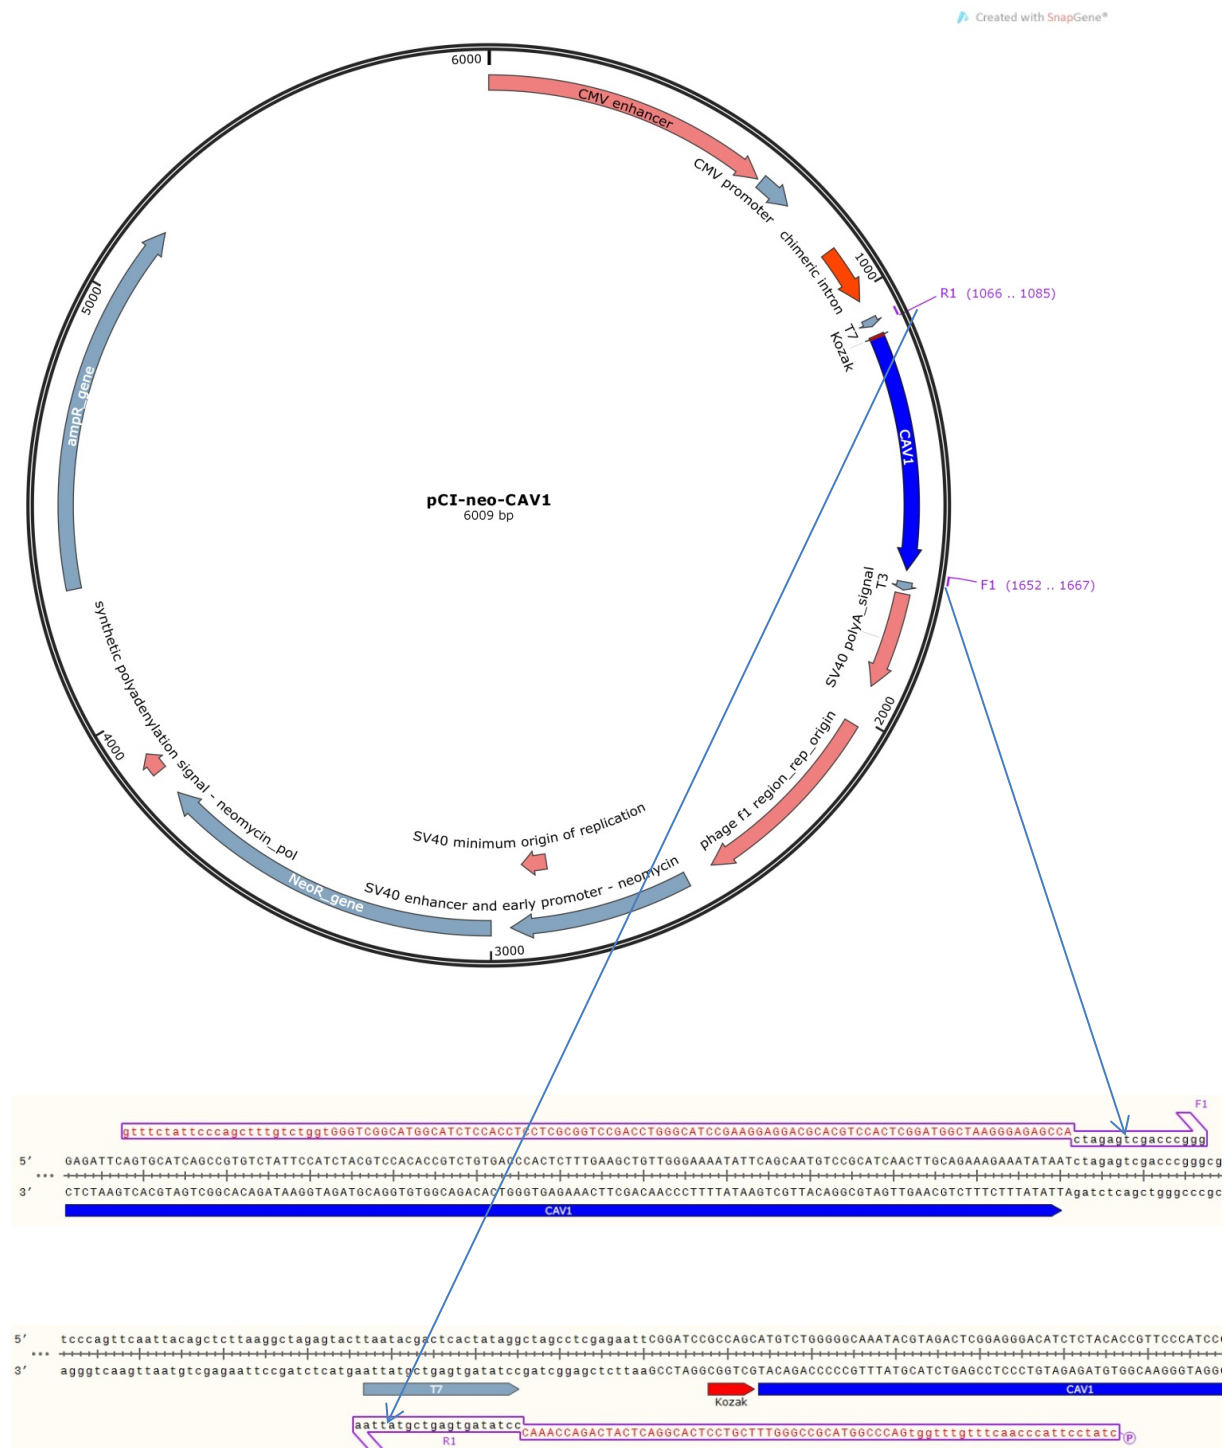

- A) **Vector map of the donor plasmid pCi-neo-CAV1** using as a template for the PCR. Two PCR primers forward primer trailer\_HDVrz-pCi-s (F1) and the reverse primer T7\_HHRz\_leader\_as (R1), which contain the MV leader, the trailer, the HHRz and the HDVrz sequences.

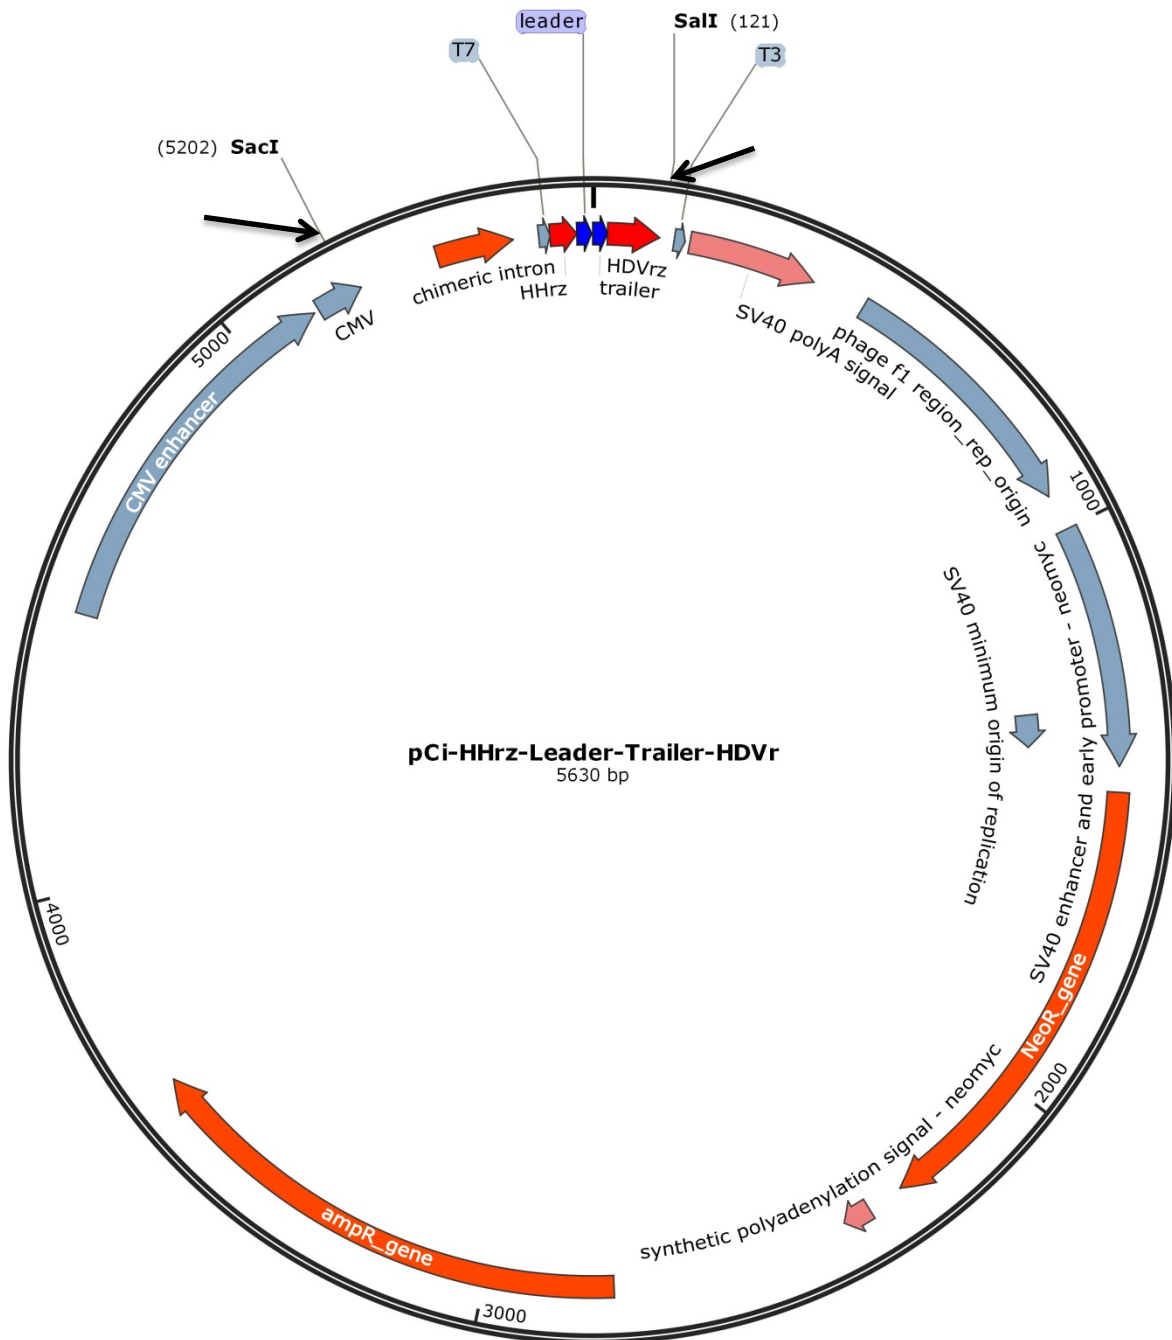

- B) **The vector map of the plasmid pCi-HHrz-HDVrz.** The arrows indicate the restriction site for the digestion of the DNA-fragment containing the cassette of the MV sequences.

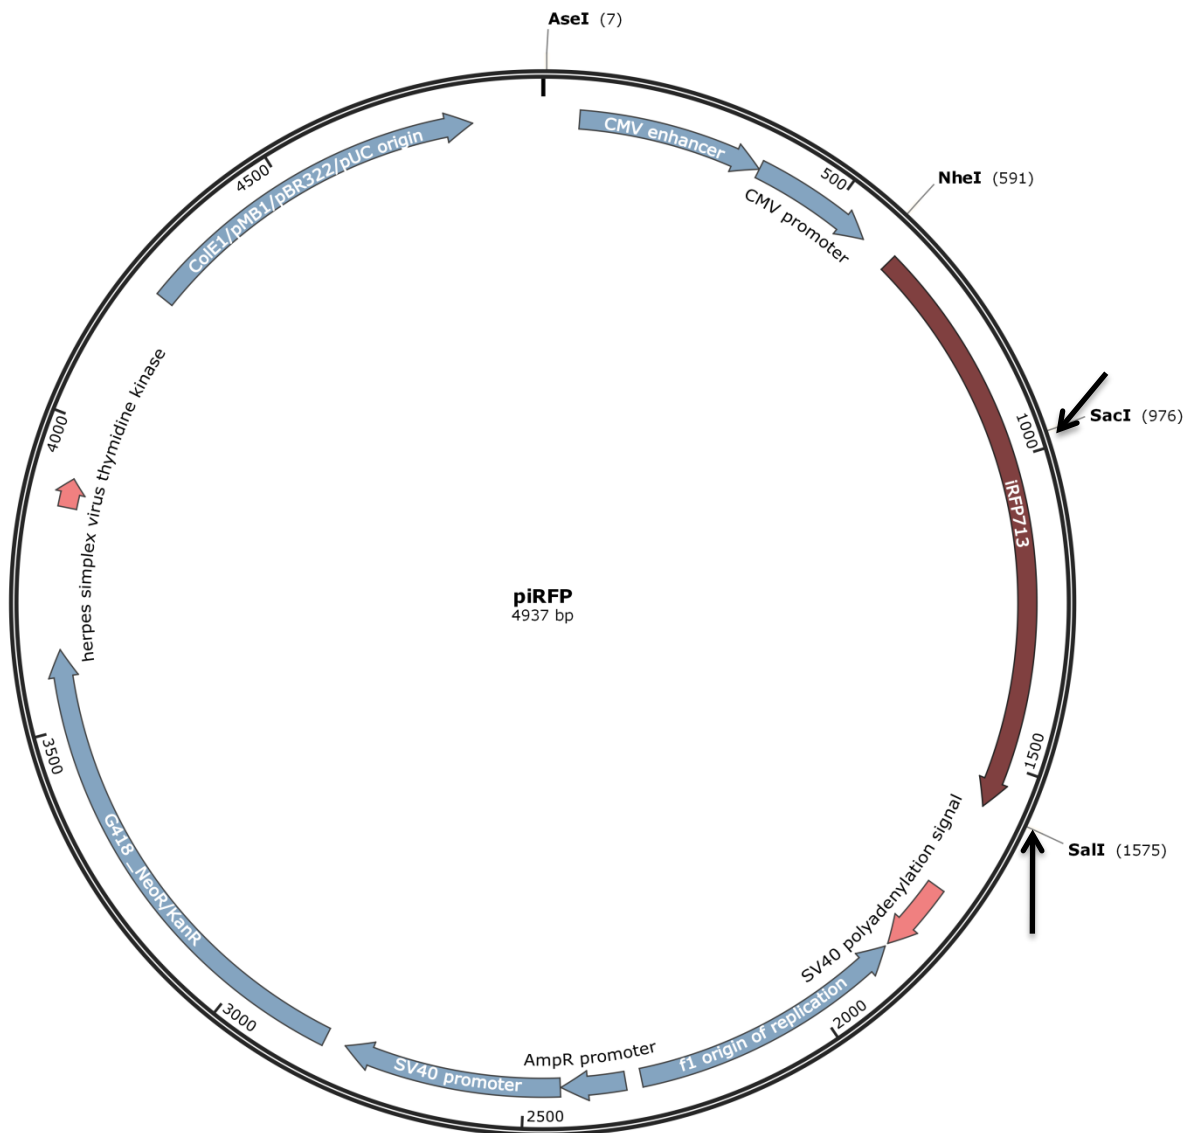

- C) **Vector map of the donor plasmid piRFP.** The arrows indicate the restriction sites SacI and SalI for the subcloning into the plasmid pCi-HHrz-HDVrz.

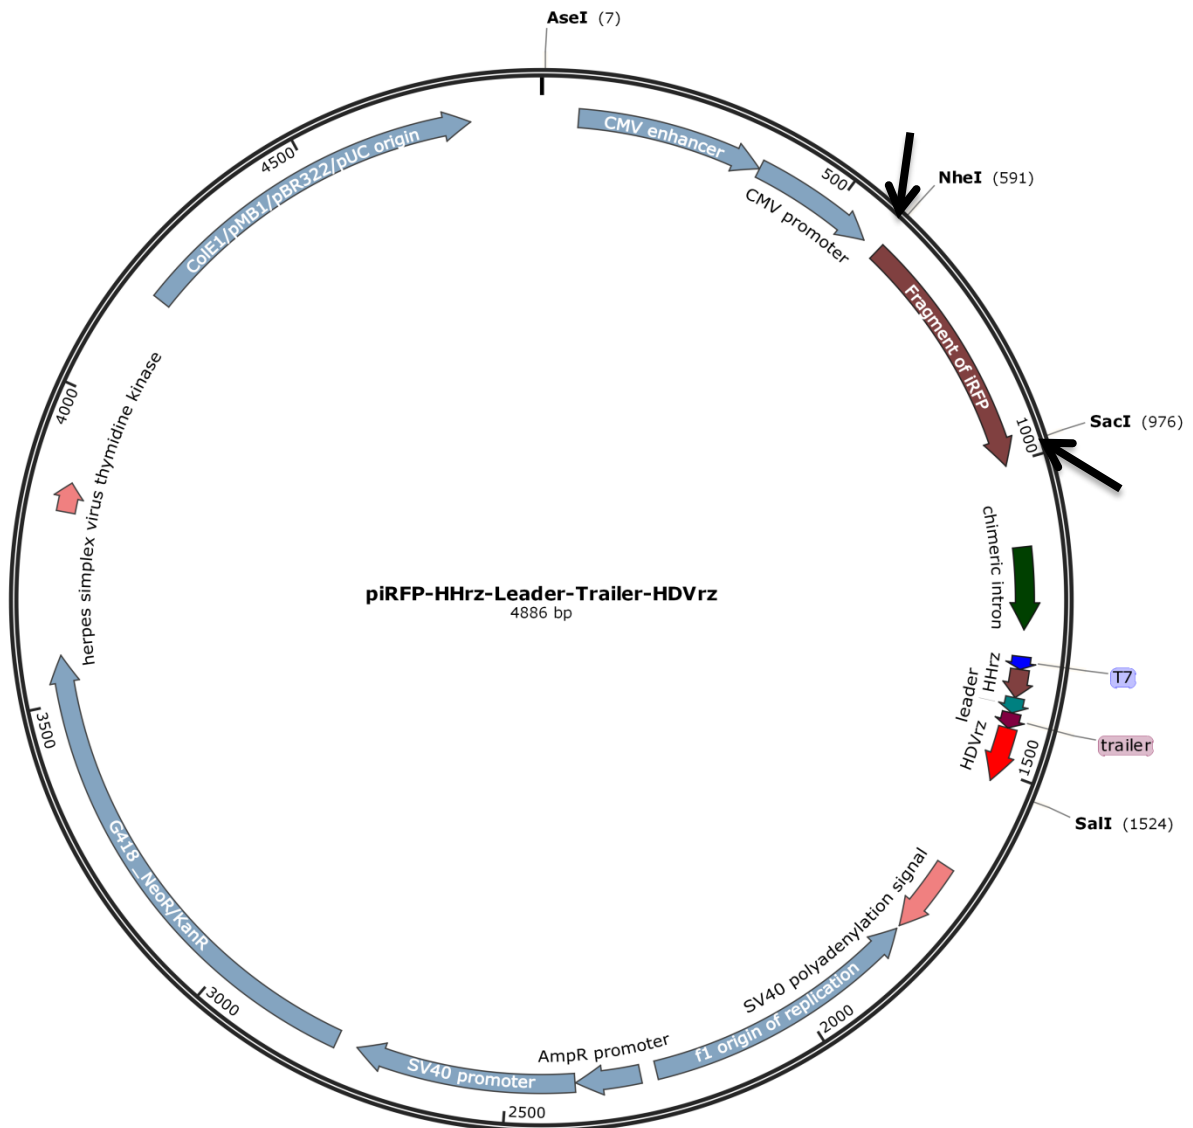

- D) **Vector map of the resulting shuttle plasmid piRFP-HHrz-HDVrz.** The arrows indicate the restriction site for the removing the DNA-fragment containing the remaining part of the iRFP gene.

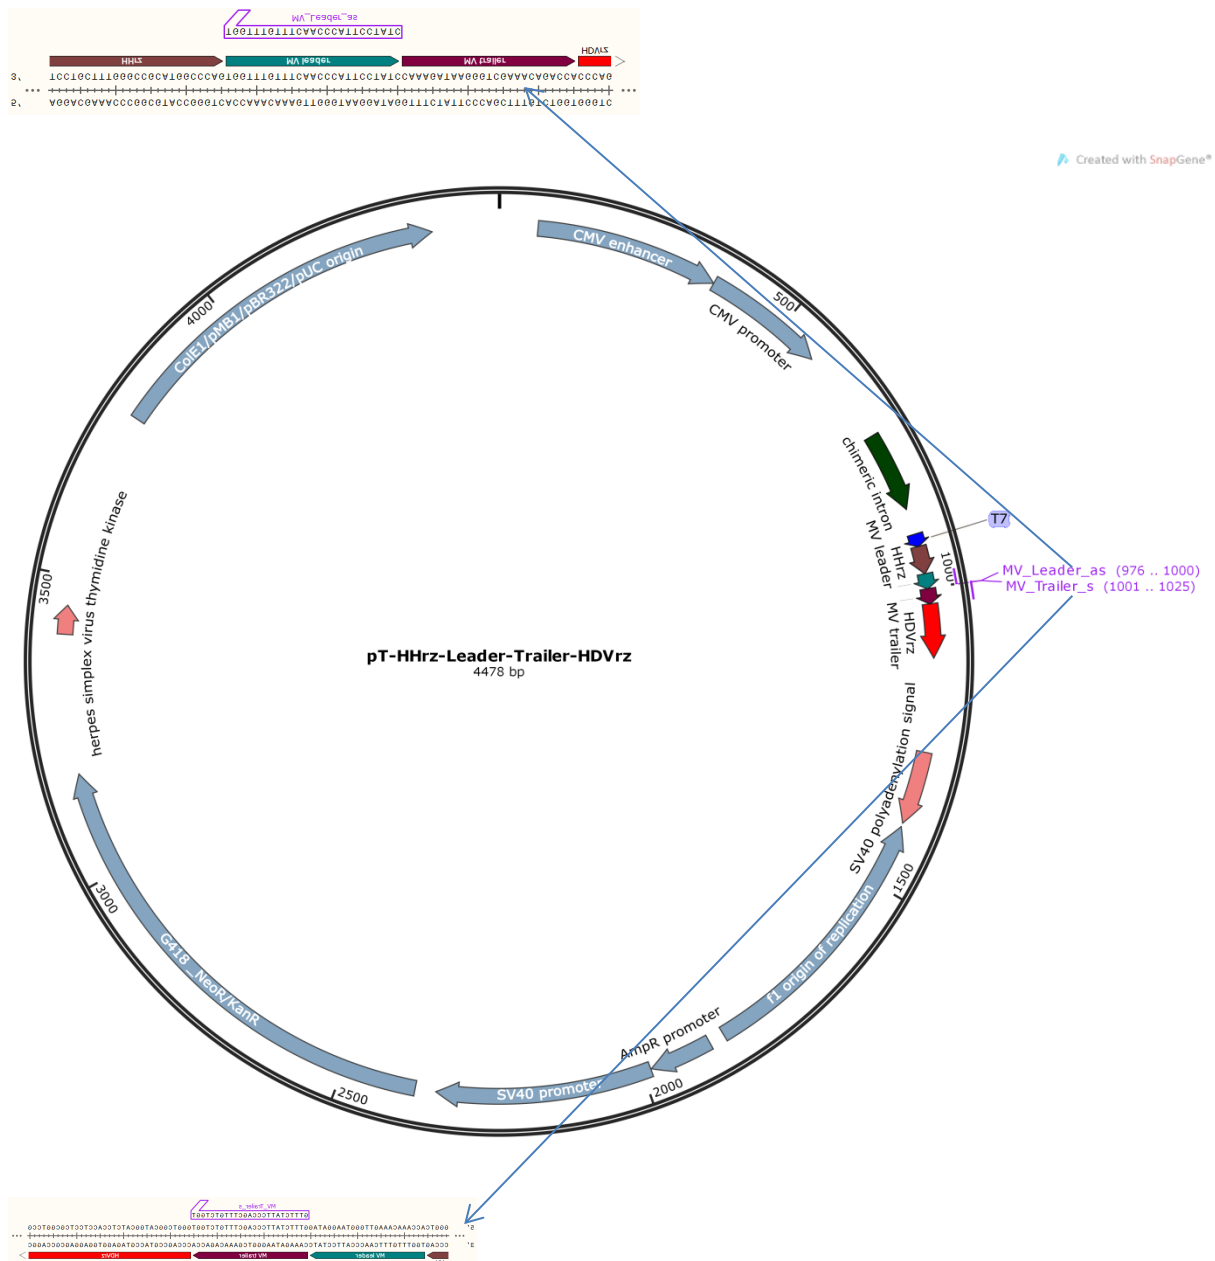

E) Vector map of the resulting vector backbone plasmid pT-HHrz-HDVrz

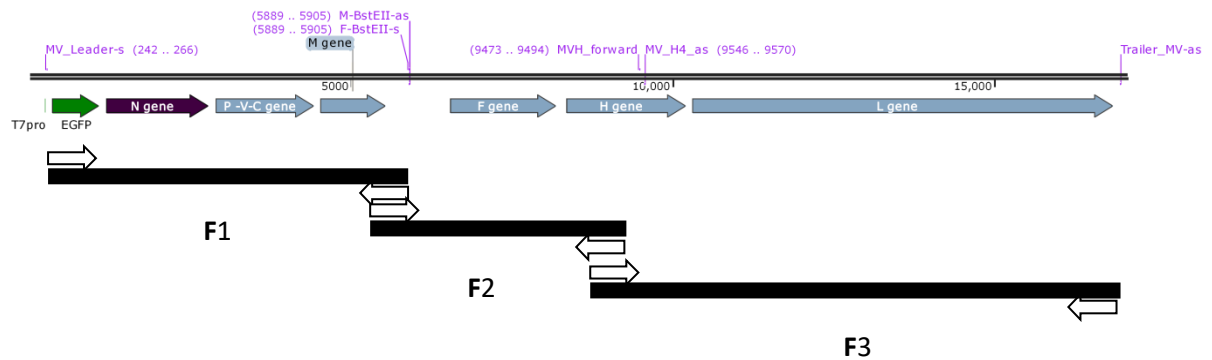

**Figure S2:** Schematic diagrams of construction of full-length MV cDNA. Primer locations and PCRs fragments generated from the MV antigenome template plasmid p(+)MV323-eGFP or p(+)MVAIK-eGFP

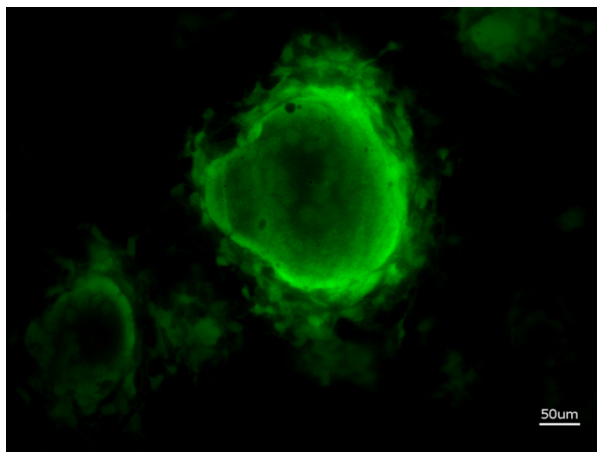

Green fluorescence (eGFP)

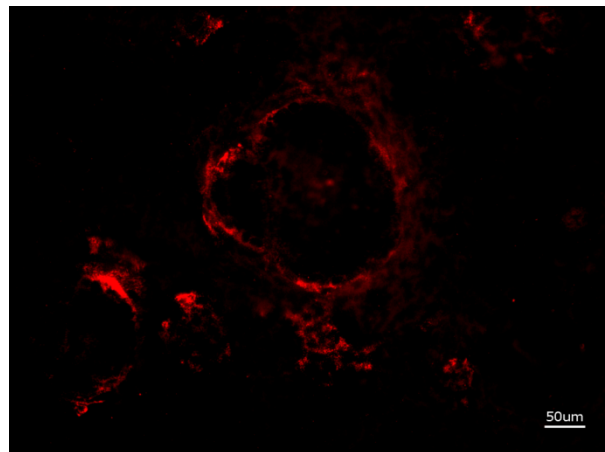

Red fluorescence. Cells were immunostained with monoclonal antibody against MV N protein

**Figure S3:** Immunohistochemistry for detecting MV N protein. Vero/hSLAM cell monolayers grown on glass coverslips were infected with MV and immunofluorescent staining with primary antibodies mouse anti MV N and secondary antibodies (Alexa fluor 546 donkey anti-mouse).
